# Supplementary material
Source: PubMed Central journal article supplement (PMC4066663)
Supplement: NIHMS574808-supplement-1.pdf [file NIHMS574808-supplement-1.pdf]

# Essential Role for Autophagy in the Maintenance of Immunological Memory Against Influenza Infection

Min Chen, Monica Jeongsoo Hong, Huanhuan Sun, Lei Wang, Xiurong Shi,  
Brian E. Gilbert, David B. Corry, Farrah Kheradmand and Jin Wang

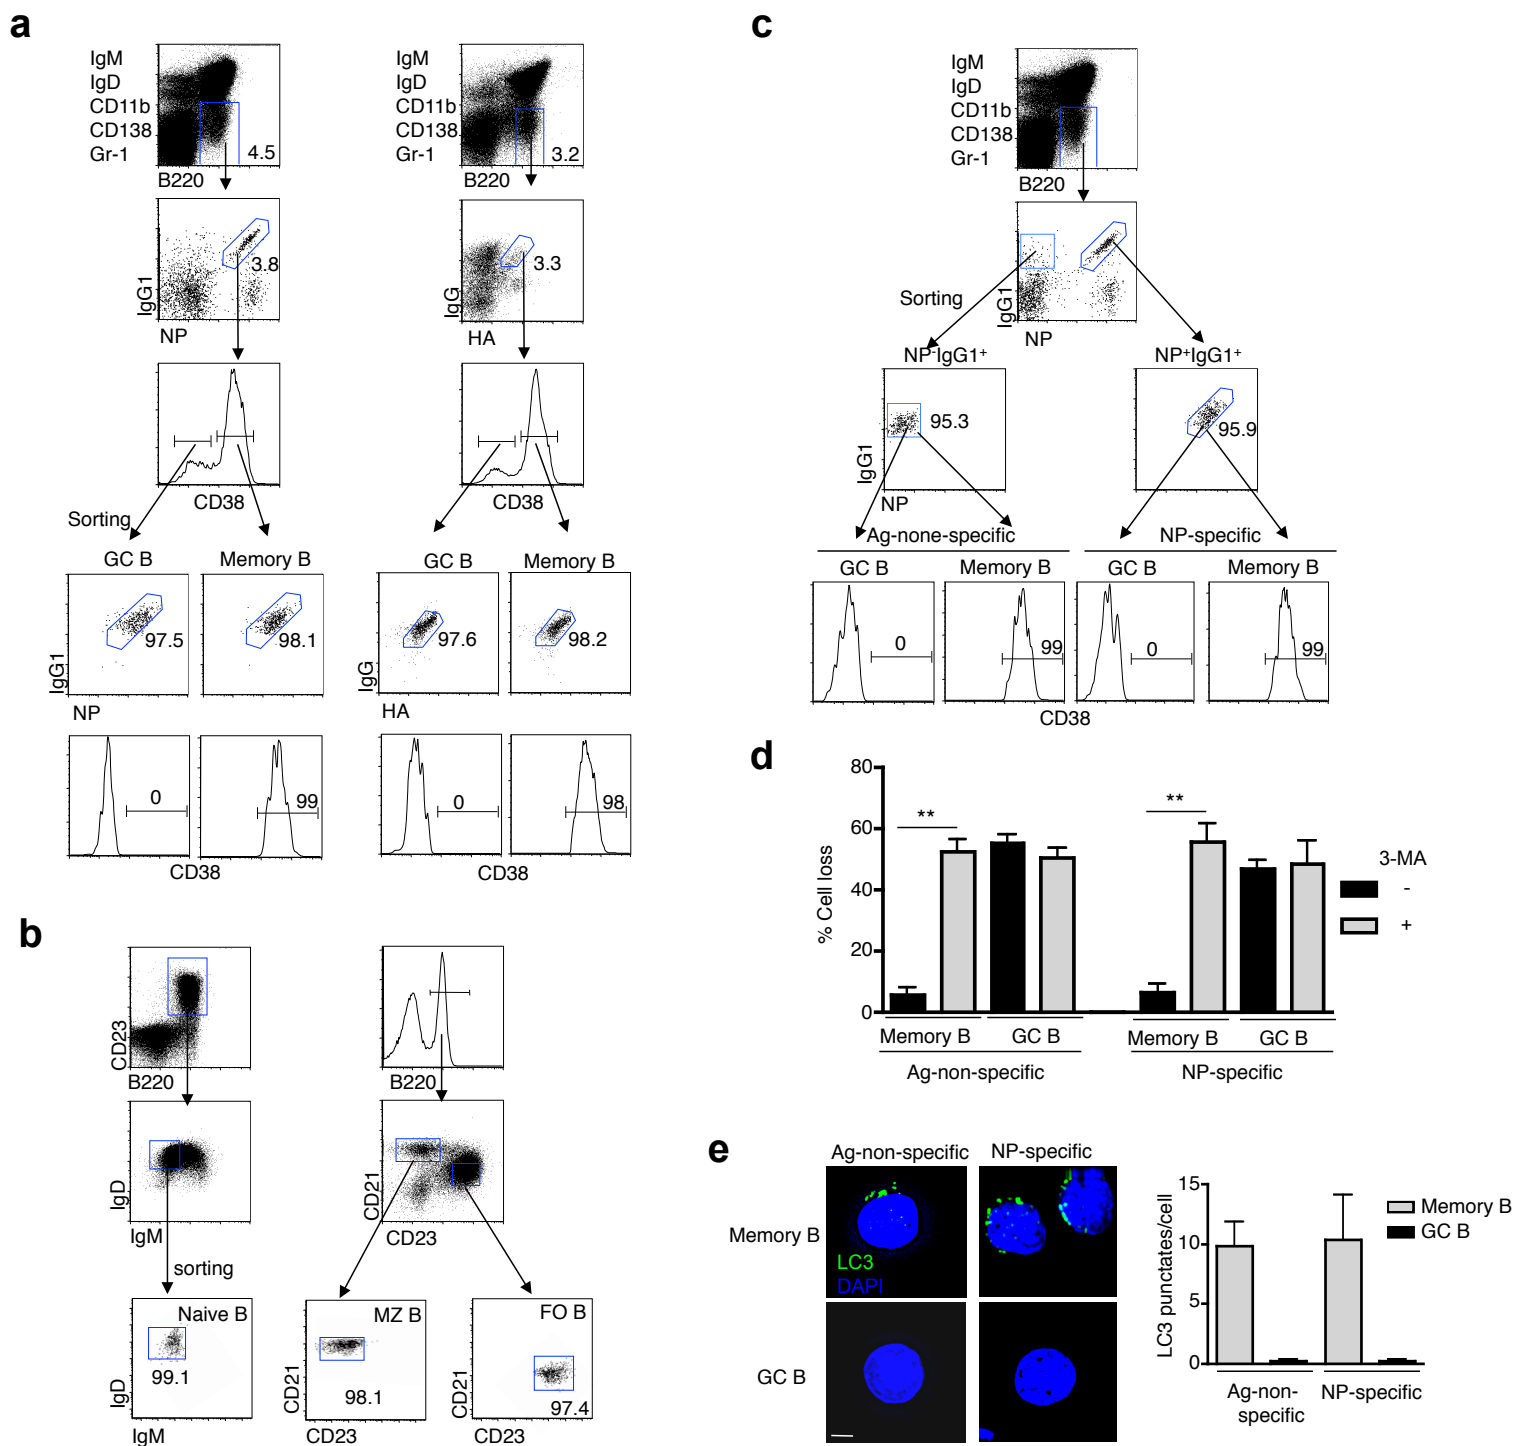

**Supplementary Figure 1. Sorting of B cell subsets for analyses of cell death and autophagy.**

(a) Splenocytes of mice immunized as in Figure 1a were used for cell sorting of NP-specific memory and GC B cells. (b) Naïve, marginal zone (MZ) and follicular (FO) B cells were sorted from unimmunized mouse spleen and analyzed by flow cytometry. (c) NP-specific and non-specific memory B cells and GC B cells were sorted. The purity of sorted cells were analyzed by flow cytometry. (d) Antigen-specific and non-specific memory B cells and GC B cells sorted in (c) were cultured in the presence or absence of 3-methyladenine (3-MA) and cell death was quantitated. (e) Antigen-specific and non-specific memory and GC B cells were used for immunocytochemistry staining for LC3. LC3 punctates in the cells were also quantified ( $n=10$ ). Scale bar: 5  $\mu\text{m}$ .

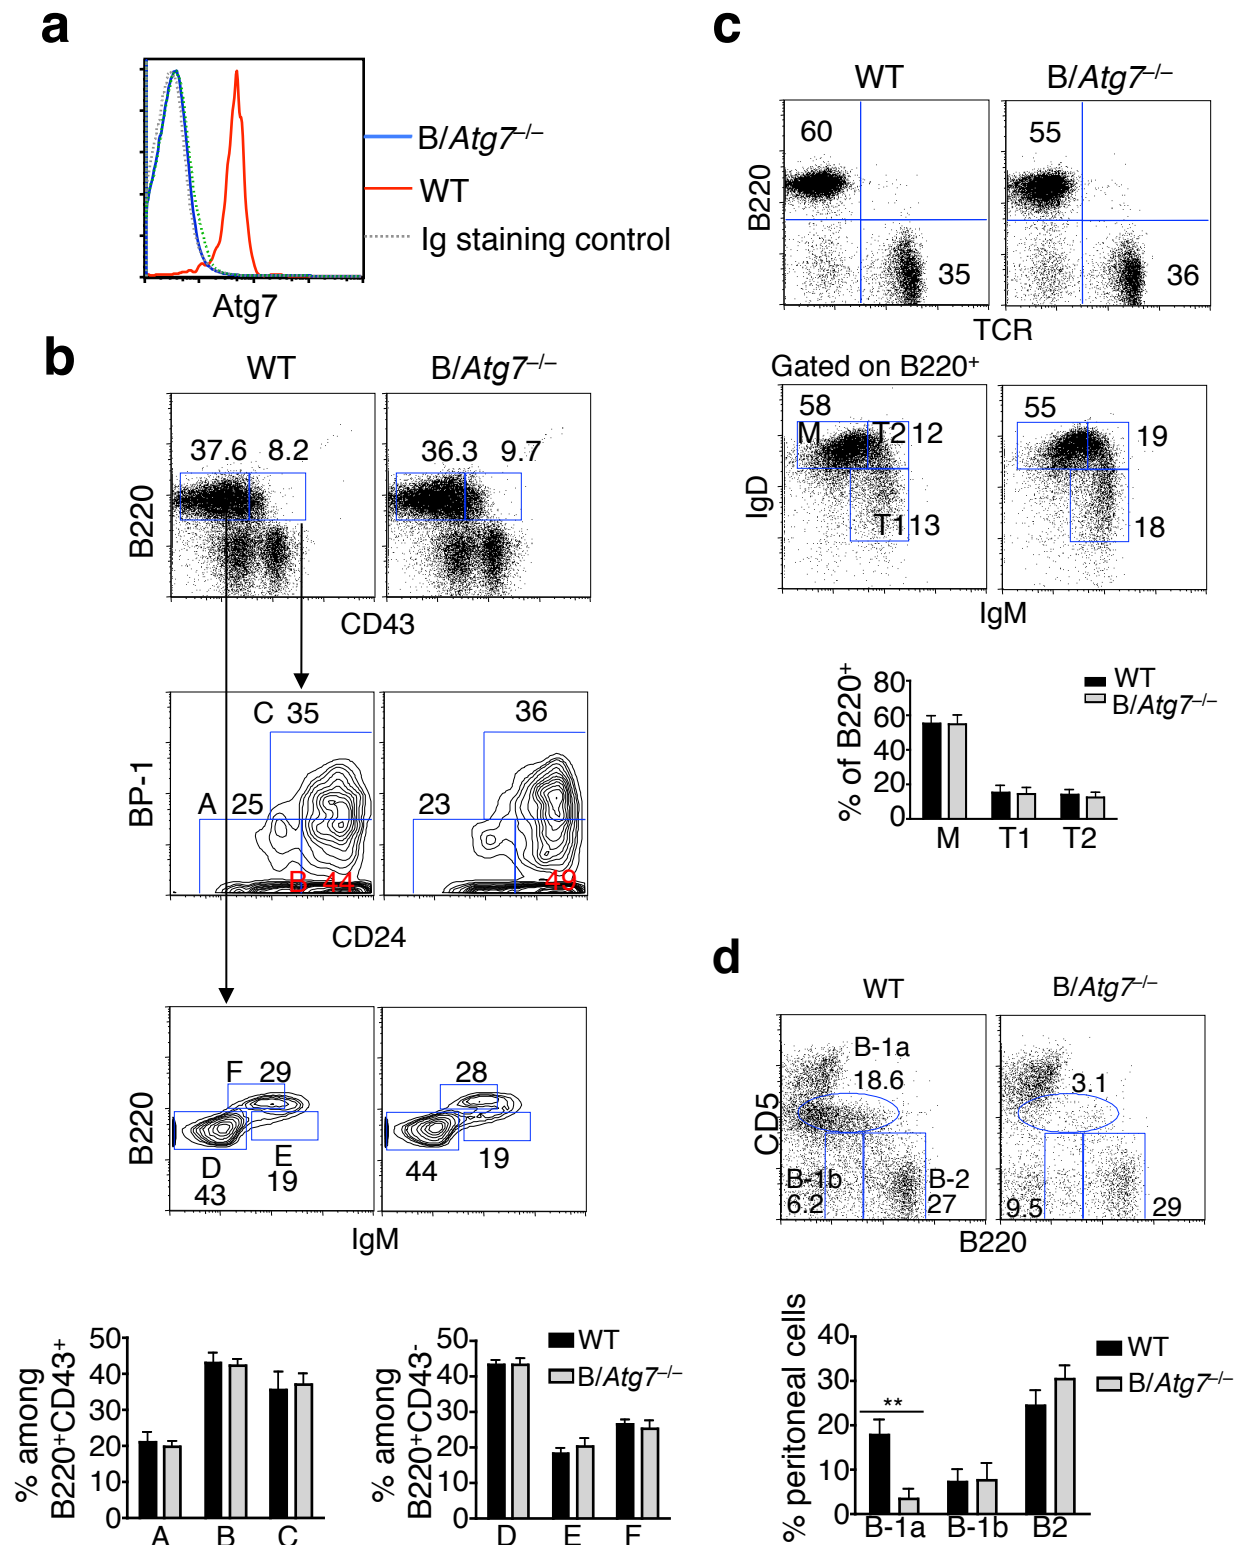

### Supplementary Figure 2. B cell development in the absence of Atg7.

(a) HA-specific memory B cells from wild type (WT) and *B/Atg7<sup>-/-</sup>* mice were used for intracellular staining with anti-Atg7 or control IgG, followed by flow cytometry analyses. (b) Staining of B cell Hardy fractions in the bone marrow that represent pro- and pre-B cell development stages (Hardy et al., *J. Exp. Med.* 173:1213-1225). (c) Staining of T and B cells in the spleen. M: Naïve mature B cells; T1 and T2: Transitional T1 and T2 B cells, respectively. (d) Staining of B-1 and B-2 cells in the peritoneal cavity. Data are representative of five mice per group analyzed. \*\* $P < 0.01$

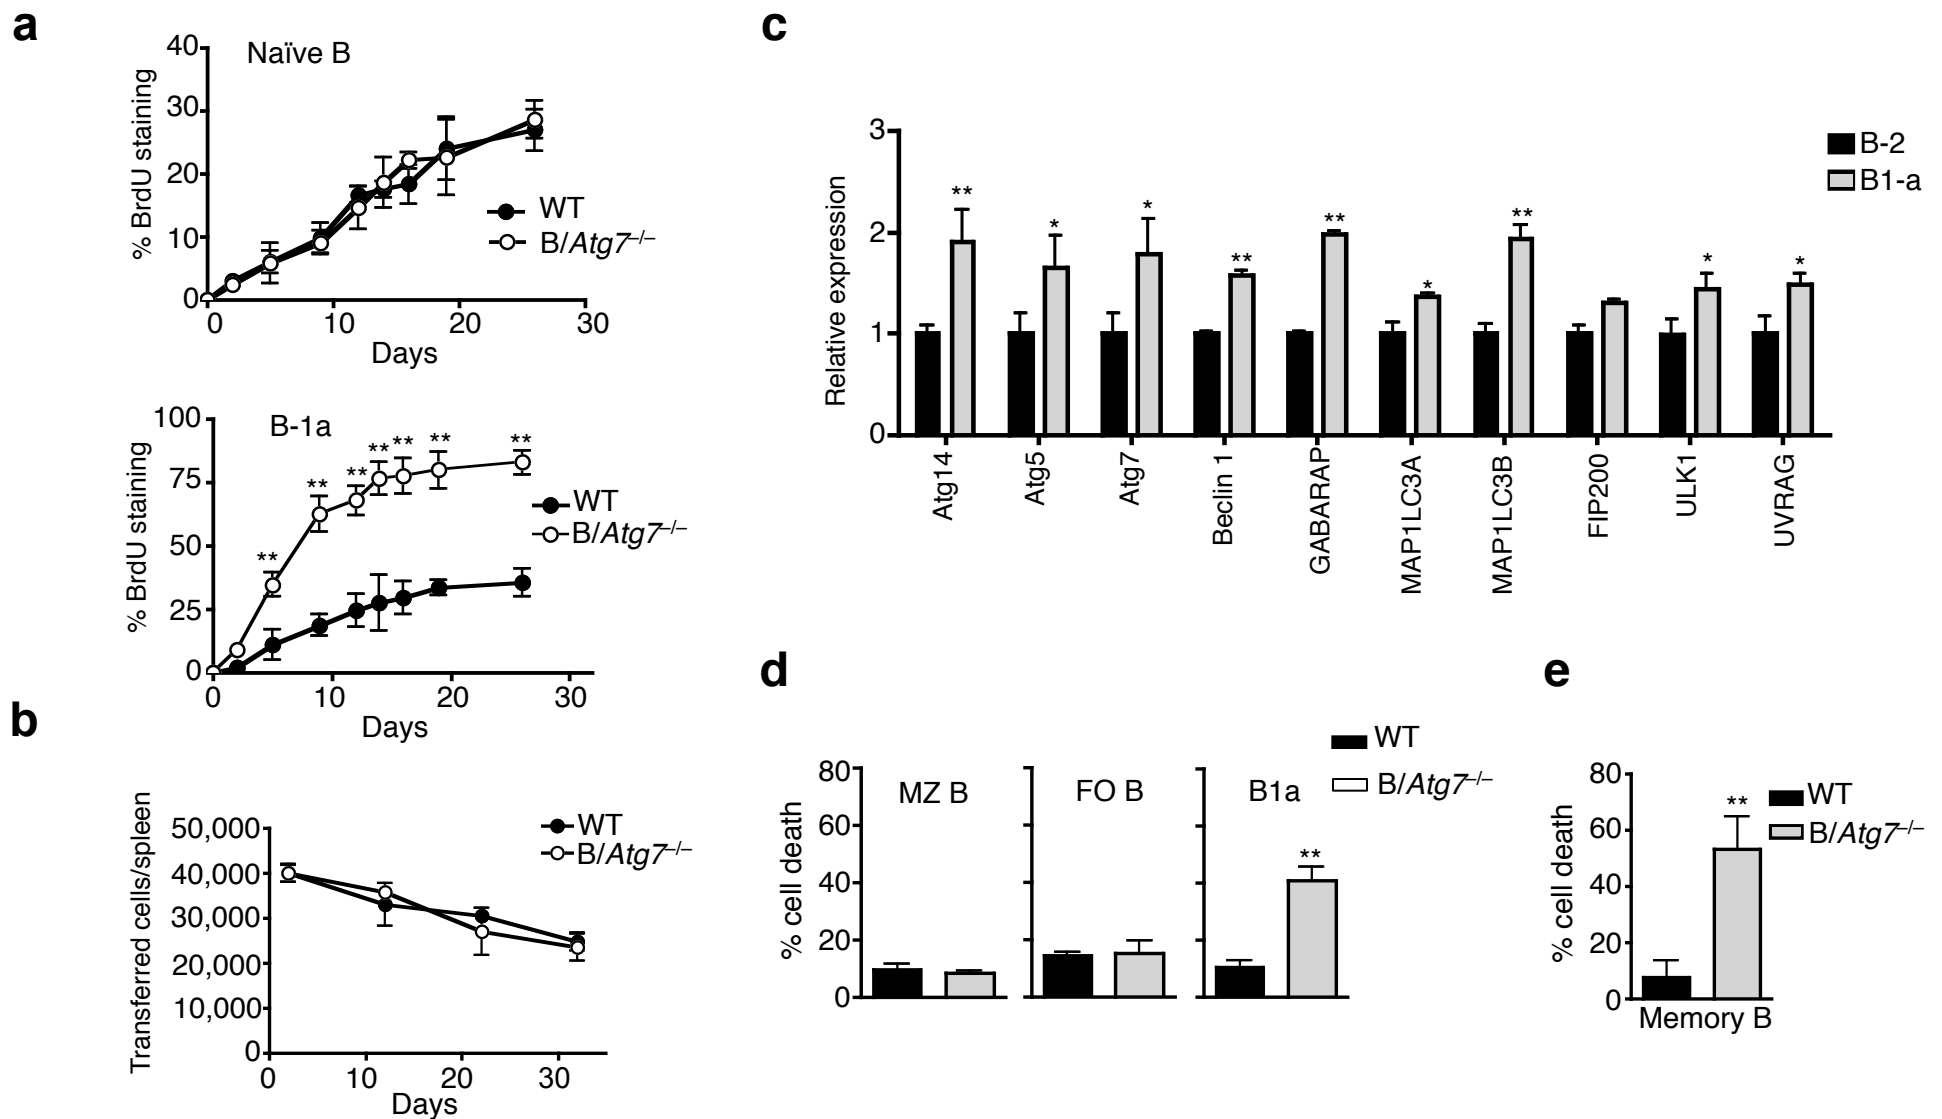

### Supplementary Figure 3. Autophagy in B cell subsets.

(a) Wild type (WT) and *B/Atg7<sup>-/-</sup>* mice were fed with BrdU in drinking water. BrdU<sup>+</sup> cells among naïve B cells in the spleen or B-1a cells in the peritoneal cavity were quantitated at indicated time (3 mice for each time point per group). \*\**P*<0.01. (b) B220<sup>+</sup>IgM<sup>low</sup>IgD<sup>+</sup>CD23<sup>+</sup>IgG<sup>-</sup> naïve B cells sorted from the spleen of WT or *B/Atg7<sup>-/-</sup>* mice were adoptive transferred into congenic CD45.1 mice. Total transferred cells in the spleen of recipients were quantitated by flow cytometry between day 2 and day 32 after the transfer (3 mice for each time point per group). (c) Real-time PCR for autophagy genes in conventional B-2 cells and in B-1a cells. \**P*<0.05, \*\**P*<0.01. (d) Increased cell death in *Atg7*-deficient B-1a cells. B220<sup>+</sup>CD23<sup>low/-</sup>CD21<sup>high</sup> MZ B cells, B220<sup>+</sup>CD23<sup>+</sup>CD21<sup>-</sup> FO B cells from the spleen and CD5<sup>+</sup>B220<sup>low</sup>CD11b<sup>+</sup>CD23<sup>-</sup> B-1a cells from the peritoneal cavity were sorted. Percentage of cell death after *in vitro* culture was determined. \*\**P*<0.01 (n=3). (e) IgG1 NP-specific memory B cells were sorted from mice two weeks after immunization with NP-KLH. Cell death was analyzed as in Figure 1. \*\**P*<0.01 (n=3).

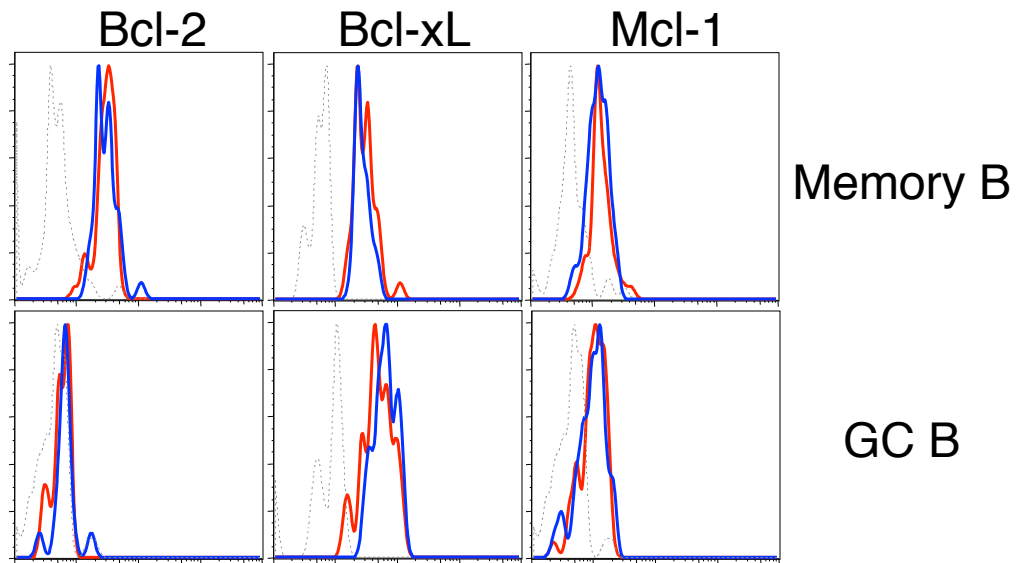

**Supplementary Figure 4.** Expression of anti-apoptotic Bcl-2 family proteins in memory B cells. B220<sup>+</sup>IgG1<sup>+</sup>NP<sup>+</sup>CD38<sup>+</sup> memory B cells and B220<sup>+</sup>IgG1<sup>+</sup>NP<sup>+</sup>CD38<sup>-</sup> GC B cells from wild type (red line) or *B/Atg7<sup>-/-</sup>* (blue line) mice were stained for surface markers, followed by intracellular staining with FITC-anti-Bcl-2, Alexa fluor 488-anti-Bcl-xL, FITC-anti-Mcl-1 (solid lines) or isotype controls (dotted lines) and analyzed by flow cytometry.

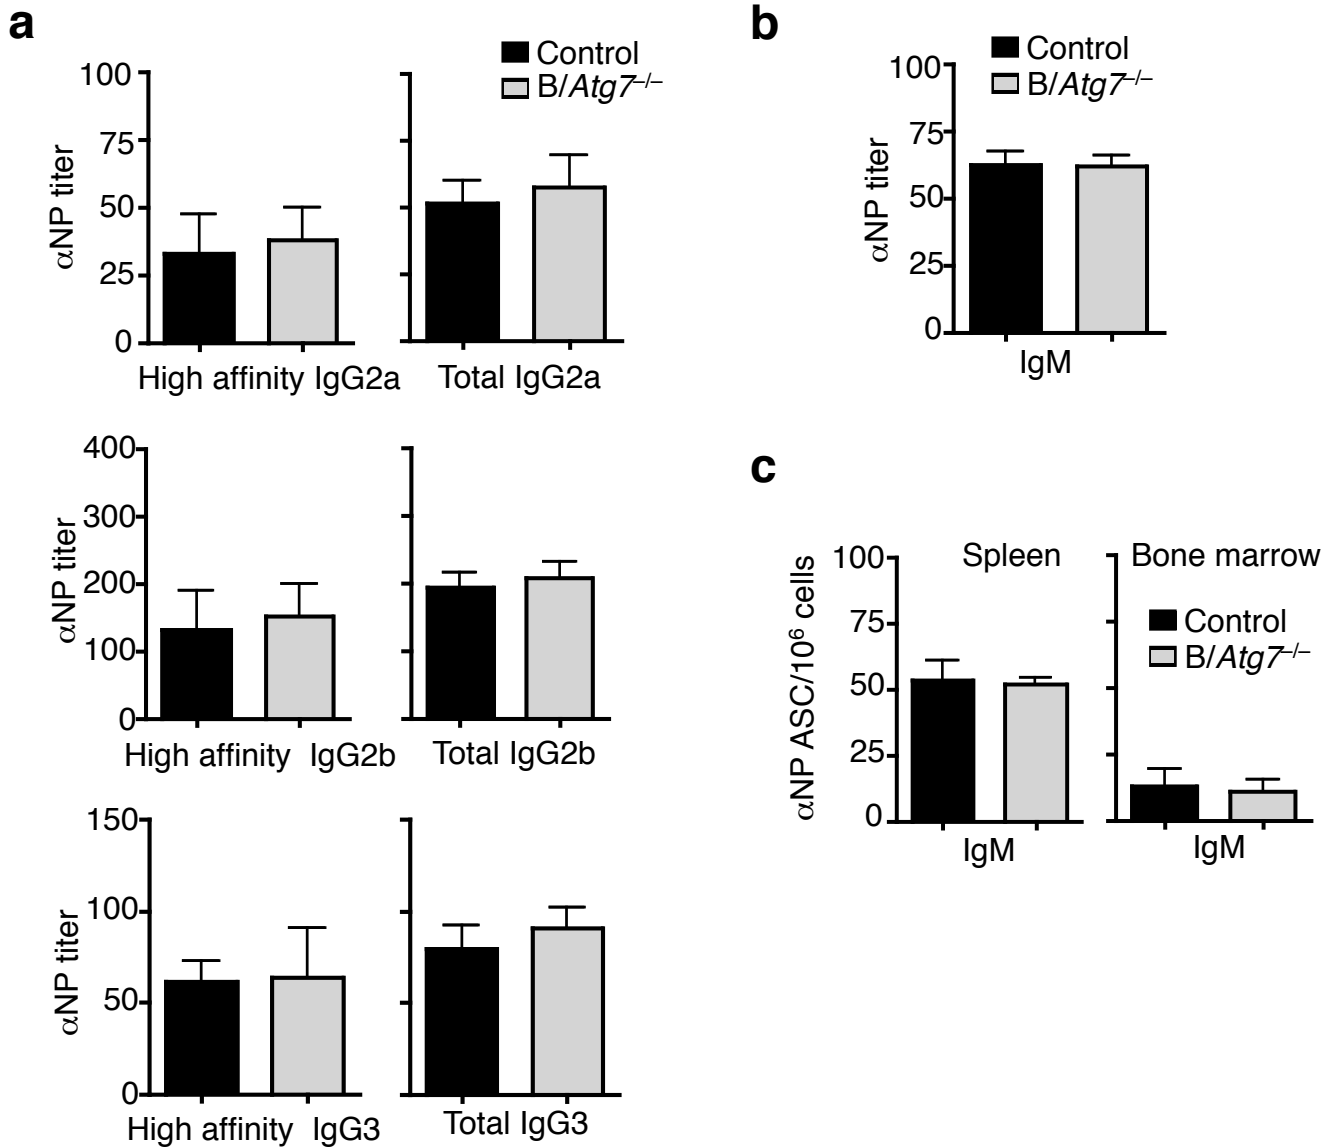

**Supplementary Figure 5. Primary antibody responses in B/Atg7<sup>-/-</sup> mice.**

(a) Mice were immunized with NP-KLH precipitated in Alum. Two weeks later, ELISA for different subclasses of NP-specific antibodies was performed. Relative titers are shown as means  $\pm$  SEM ( $n=10$ ). (b) Mice were immunized with NP-KLH precipitated in Alum. Two weeks later, ELISA for IgM anti-NP in the sera was performed. Data are presented as mean  $\pm$  SEM ( $n=10$ ). (c) ELISPOT for IgM anti-NP ASC in the spleen and bone marrow from mice in (A) was performed. Data are presented as mean  $\pm$  SEM ( $n=10$ ).

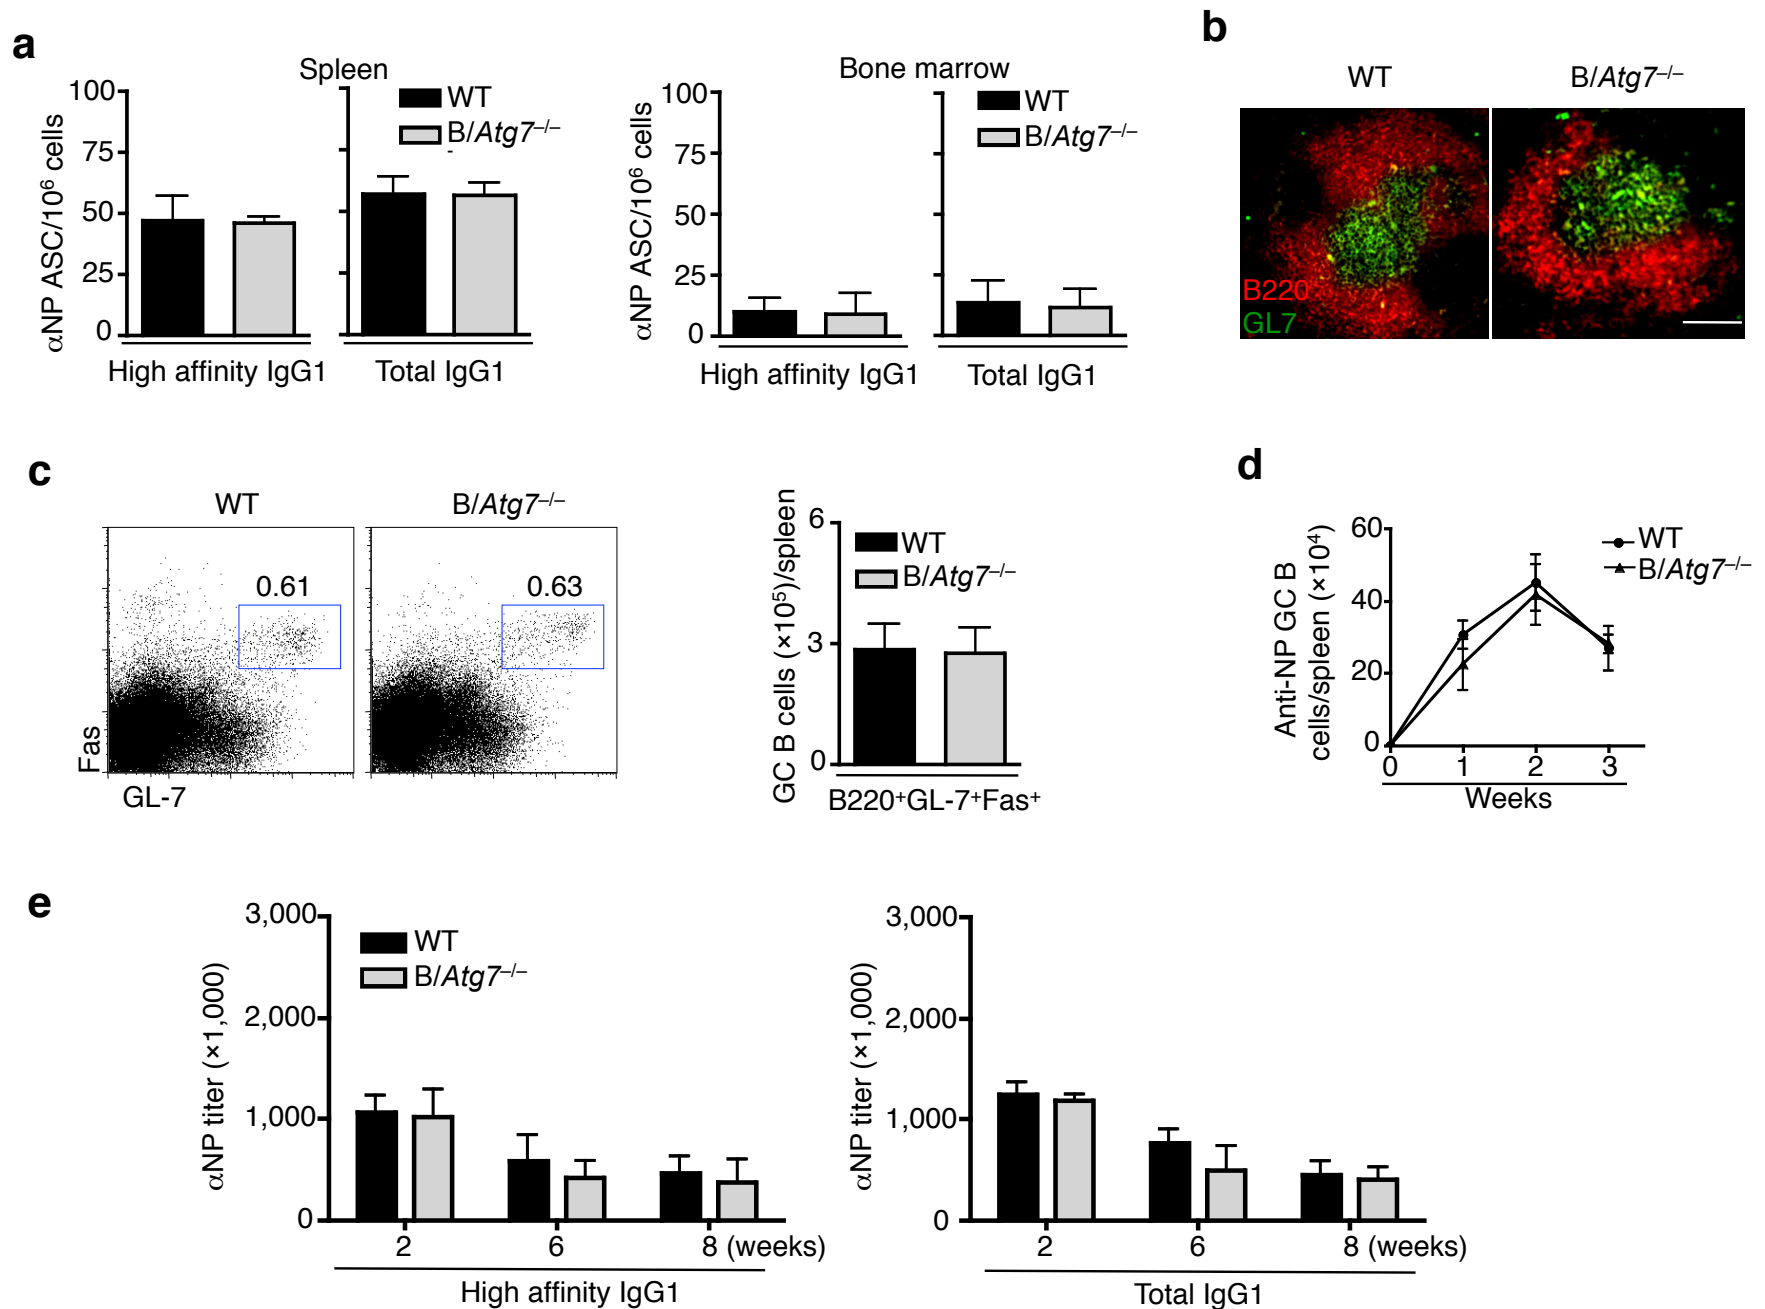

**Supplementary Figure 6. Primary antibody and GC B cell responses in B/Atg7<sup>-/-</sup> mice.** (a) B/Atg7<sup>-/-</sup> mice or *CD19-cre* mice as wild type (WT) controls were immunized with Alum-precipitated NP-KLH. Two weeks later, ELISPOT for NP-specific IgG1 ASC in the spleen and bone marrow were determined by ELISPOT. (b) Frozen spleen sections were stained with PE-anti-B220 and FITC-anti-GL7, and analyzed under a fluorescent microscope. Scale bar: 20  $\mu$ m. (c) B220<sup>+</sup>GL-7<sup>+</sup>Fas<sup>+</sup> GC B cells in the spleen of mice immunized as in (a) were analyzed by flow cytometry. Total GC B cell numbers per spleen were calculated. (d) Total anti-NP GC B cells in the spleen after immunization as in (a). (e) ELISA for anti-NP IgG1 in B/Atg7<sup>-/-</sup> mice or WT controls at different weeks after immunization.

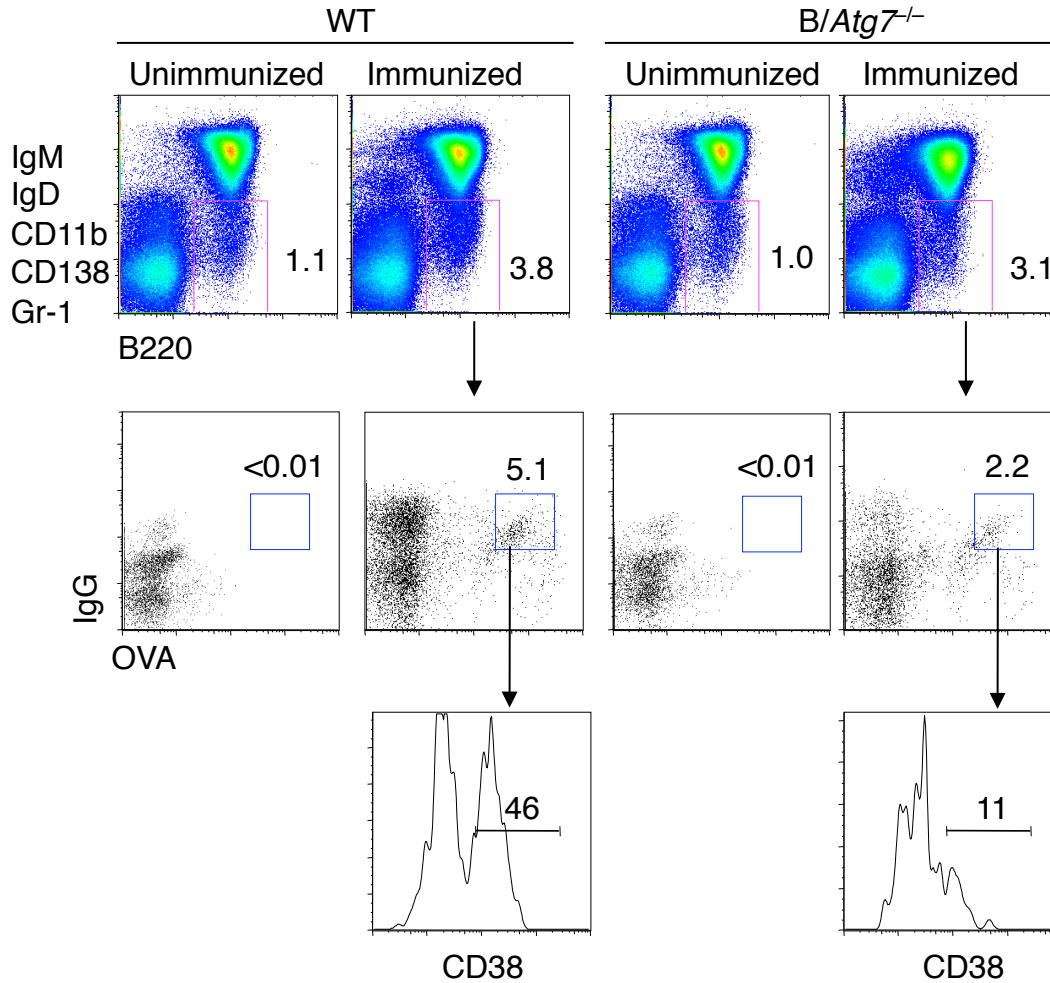

**Supplementary Figure 7. Loss of memory B cells due to autophagy deficiency.** Mice immunized with Alum-precipitated ovalbumin (OVA) were re-challenged with soluble OVA two months later. An example of flow cytometry of OVA-specific memory B cells in the spleen of immunized mice or unimmunized control is shown.

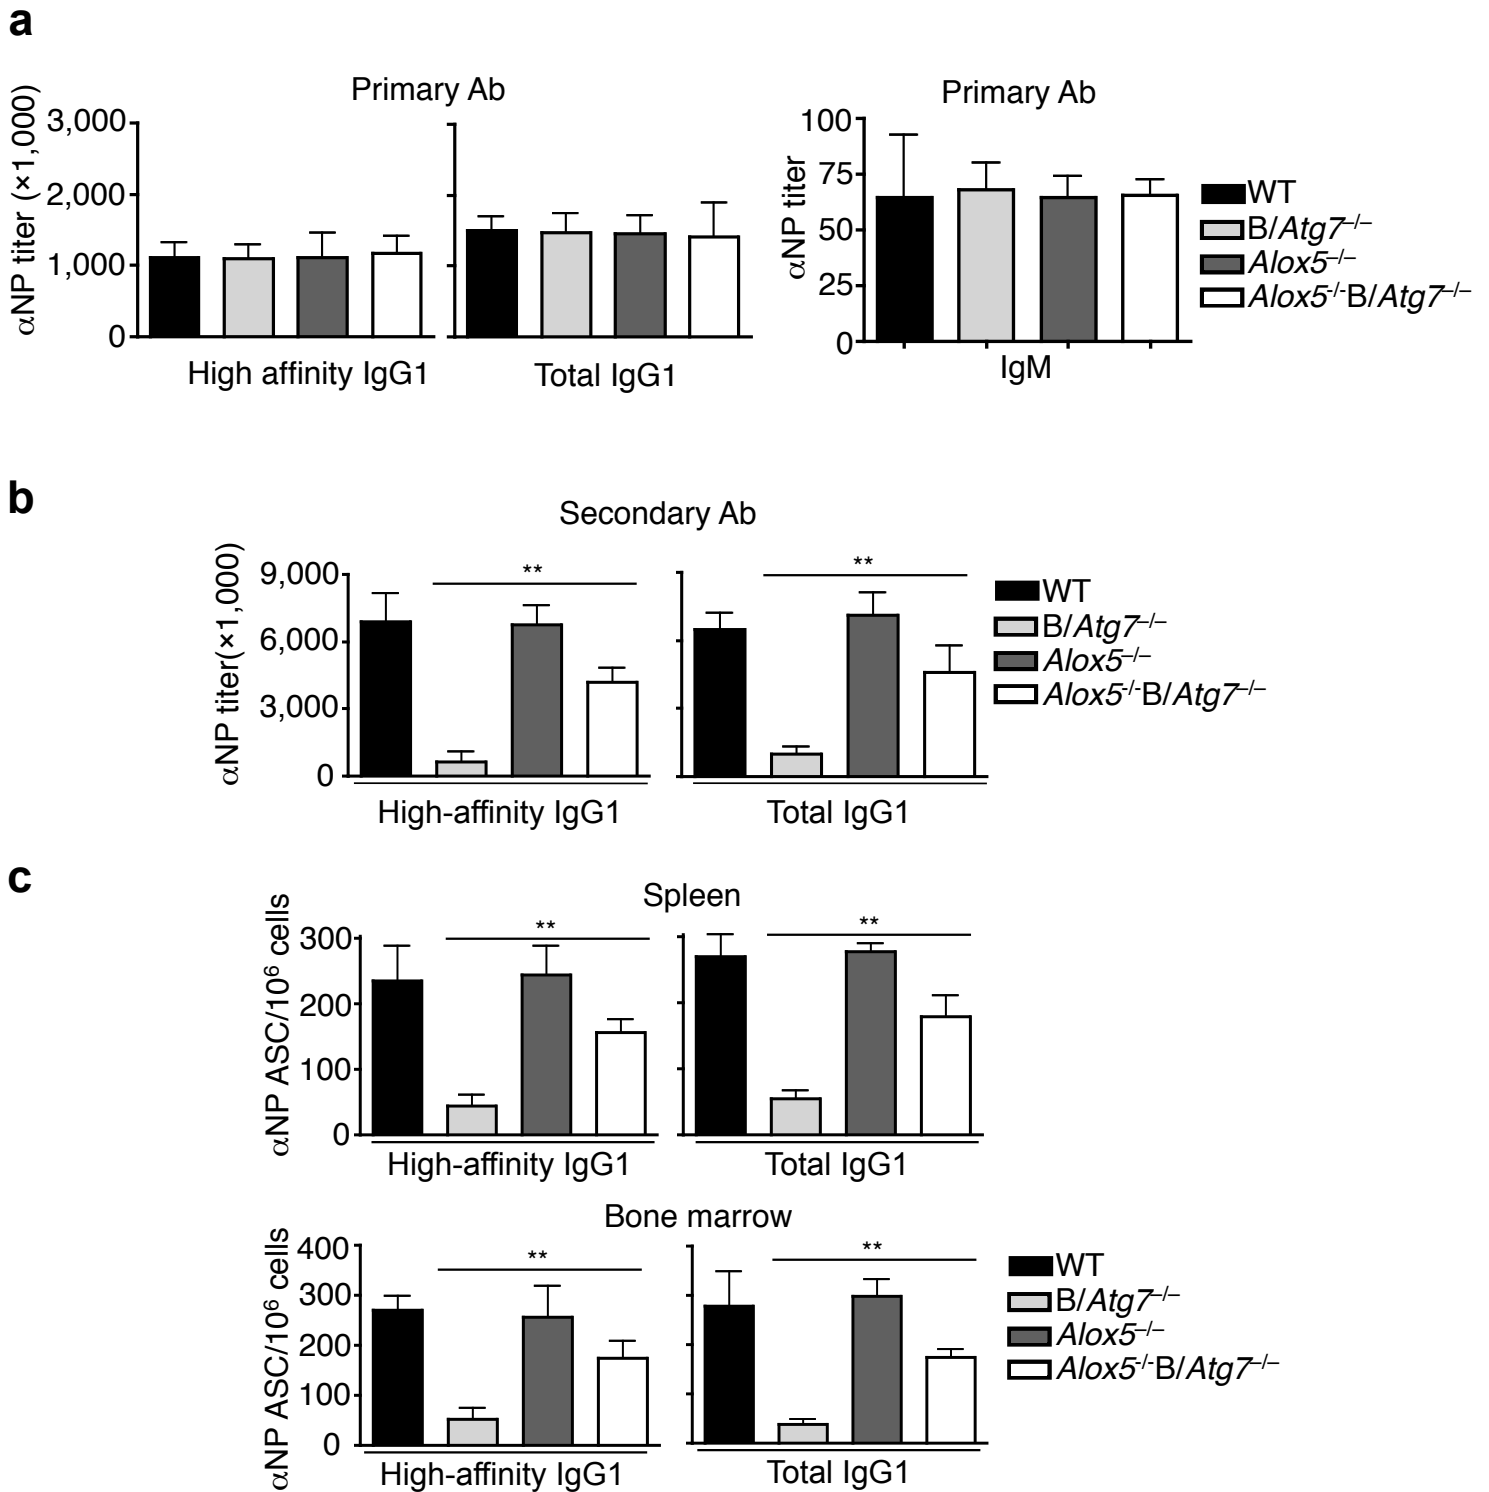

**Supplementary Figure 8. Rescue of secondary antibody responses in *B/Atg7<sup>-/-</sup>* mice by deletion of *Alox5*.** (a) Two-month-old *Alox5<sup>-/-</sup>B/Atg7<sup>-/-</sup>*, *Alox5<sup>-/-</sup>*, *B/Atg7<sup>-/-</sup>* and wild type (WT) mice were immunized with NP-KLH. Primary antibody responses were determined as in Figure 3. (b, c) Mice immunized as in (a) were challenged with the antigen 2 months later. Anti-NP antibodies in the sera were determined by ELISA 5 days later (b). NP-specific ASC were determined by ELISPOT (c). \*\* $P < 0.01$ . Five mice of each group were used in the experiments.



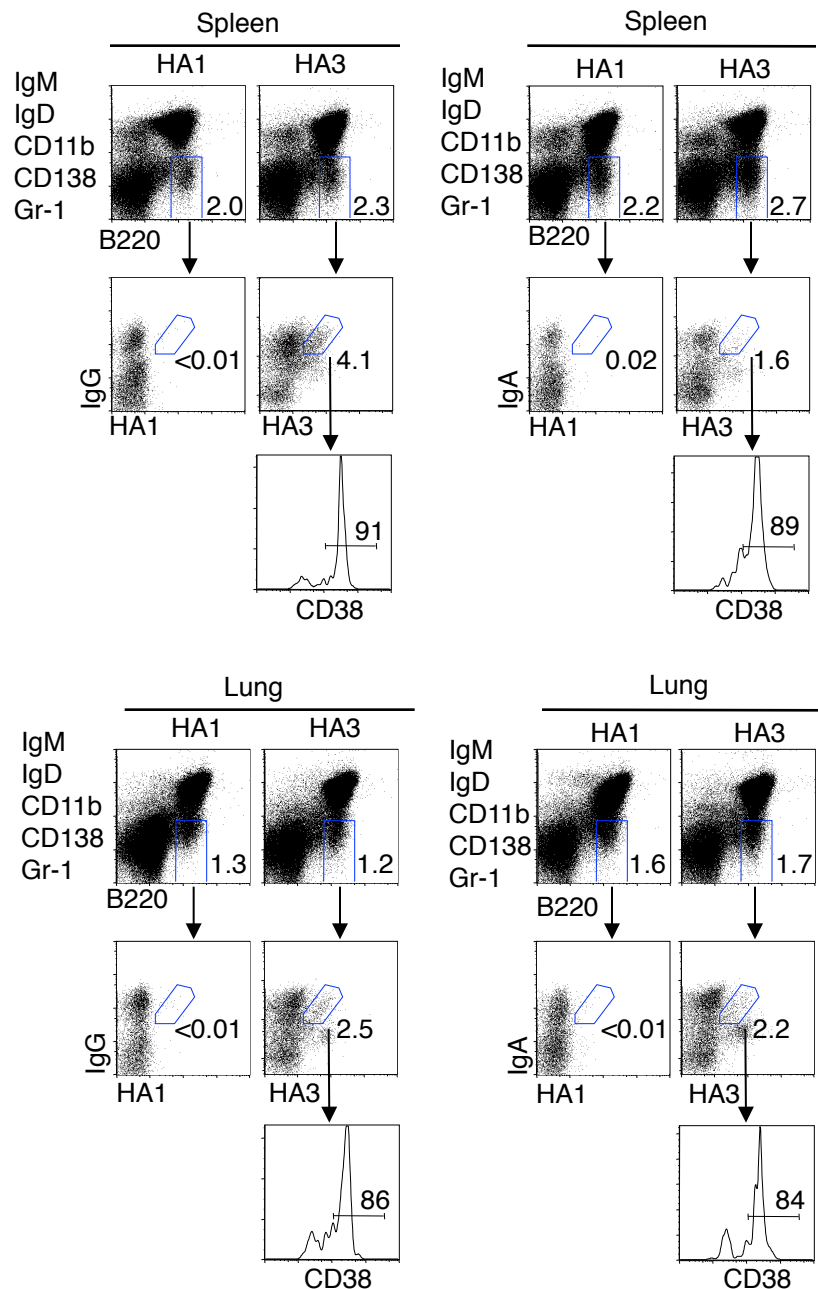

**Supplementary Figure 9. Staining of influenza A HA-specific memory B cells.** Wild type mice were immunized with influenza A as in Figure 5. The cells from the spleen and lung were stained as in Figure 5 except that HA1 instead of HA3 was used for staining in some groups as negative controls as previously described (Onodera et al., *Proc. Natl. Acad. Sci. U.S.A.* 109: 2485–2490). The cells were analyzed by flow cytometry.

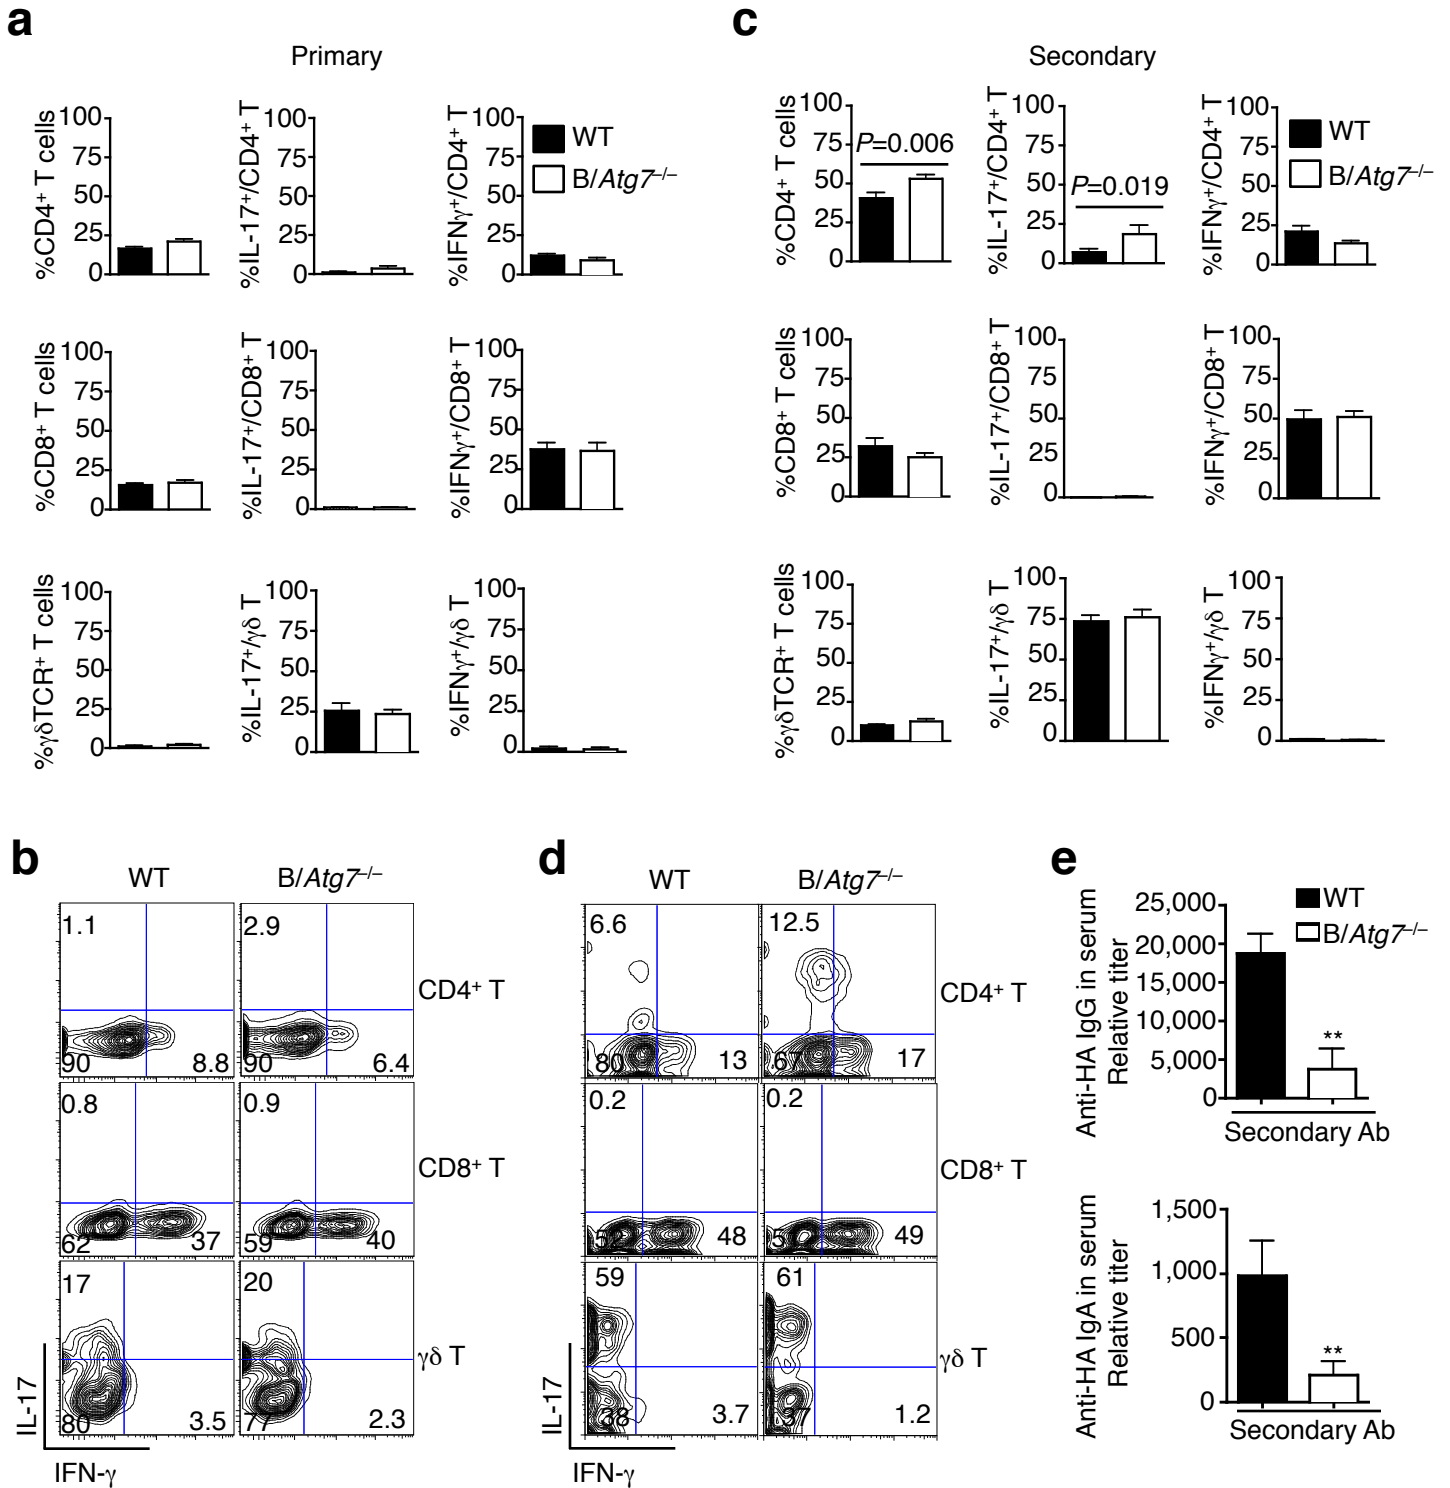

**Supplementary Figure 10. T cell responses in *B/Atg7<sup>-/-</sup>* mice after immunization with the influenza A virus.**

(a,b) Primary T cell responses in the spleen were examined by intracellular staining of cytokines 3 weeks after immunization with influenza A viruses ( $n=6$ ). The examples of one set of mice are shown in (b). (c,d) To determine secondary T cell responses, immunized mice were re-challenged with influenza A viruses 8 weeks after immunization. Secondary T cell responses were examined 14 days later ( $n=7$ ). Increased CD4<sup>+</sup> T cell expansion and IL-17 production may reflect prolonged T cell stimulation due to the higher viral load in *B/Atg7<sup>-/-</sup>* mice. The examples of one set of mice are shown in (d). (e) Anti-HA antibodies in the sera of mice 14 days after secondary influenza infection. \*\* $P<0.01$ ,  $n=7$ .

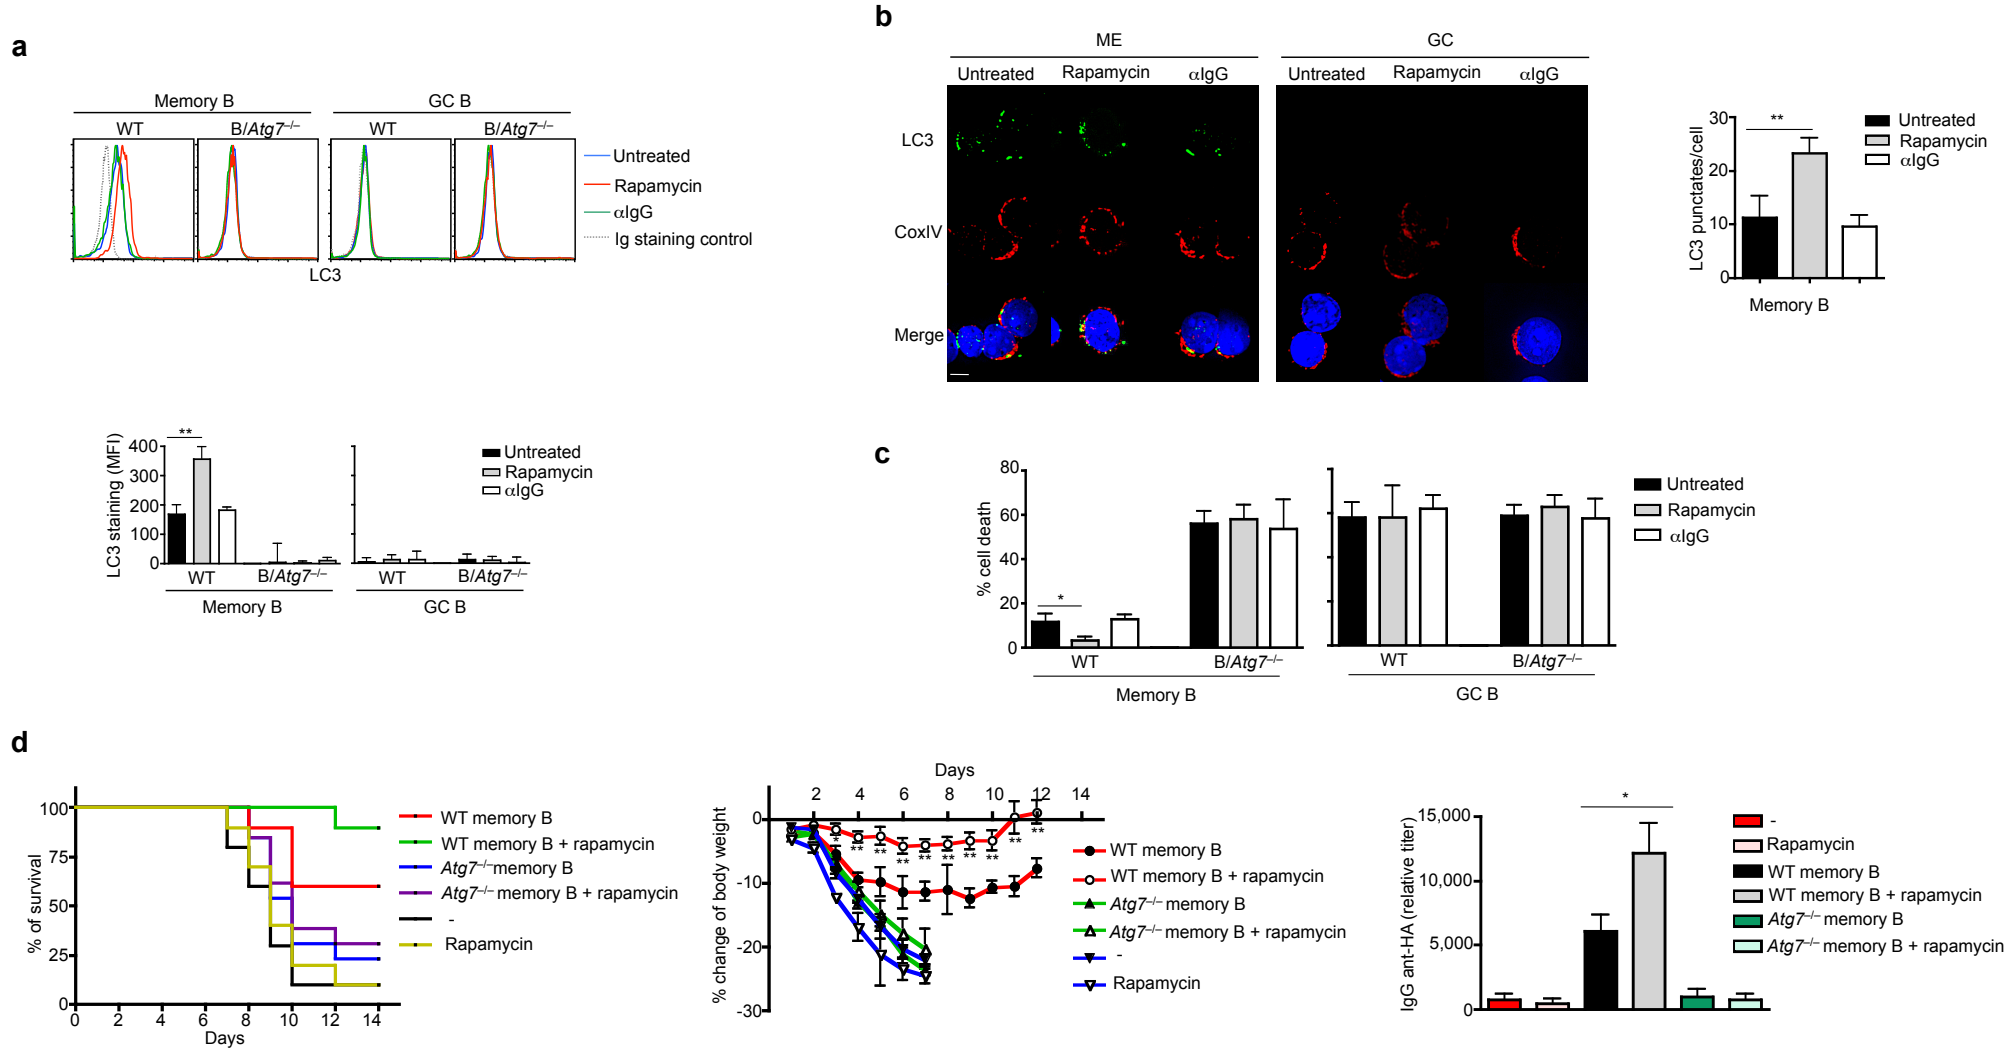

**Supplementary Figure 11. Autophagy in memory B cells.**

(a) HA-specific memory B cells with or without treatment with rapamycin or anti-IgG were used for intracellular staining with anti-LC3 or control IgG, followed by flow cytometry analyses.  $**P < 0.01$ . (b) Cells as in (a) were used for immunocytochemistry staining for LC3 and CoxIV. Scale bar: 5  $\mu\text{m}$ .  $**P < 0.01$ . (c) Cells as in (a) were cultured as in Figure 2 for cell death analyses.  $*P < 0.05$ . (d) HA-specific WT or *Atg7<sup>-/-</sup>* memory B cells were sorted from pooled spleens and lungs from influenza infected mice and adoptively transferred i.v. ( $10^4$ /mice) into *Atg7<sup>-/-</sup>* mice which had received a sublethal dose (7.5 TCID<sub>50</sub>) of H3N2 influenza A virus 3 months ago. One day after transfer, *Atg7<sup>-/-</sup>* recipients were re-infected with a lethal dose of influenza (2,500 TCID<sub>50</sub>). Weight loss and survival of *B/Atg7<sup>-/-</sup>* mice were monitored for 14 days. Some groups were treated with rapamycin i.p. daily from day -1 to day 13 during infection. Sorted naïve cells ( $2 \times 10^5$ ) were co-injected as filler cells to minimize cell loss during injection (12 mice/group). Rapamycin treatment versus no rapamycin in groups with transfers of WT memory B cells:  $P < 0.05$ ; Weight loss and anti-HA titers,  $*P < 0.05$ ,  $**P < 0.01$ .

**a**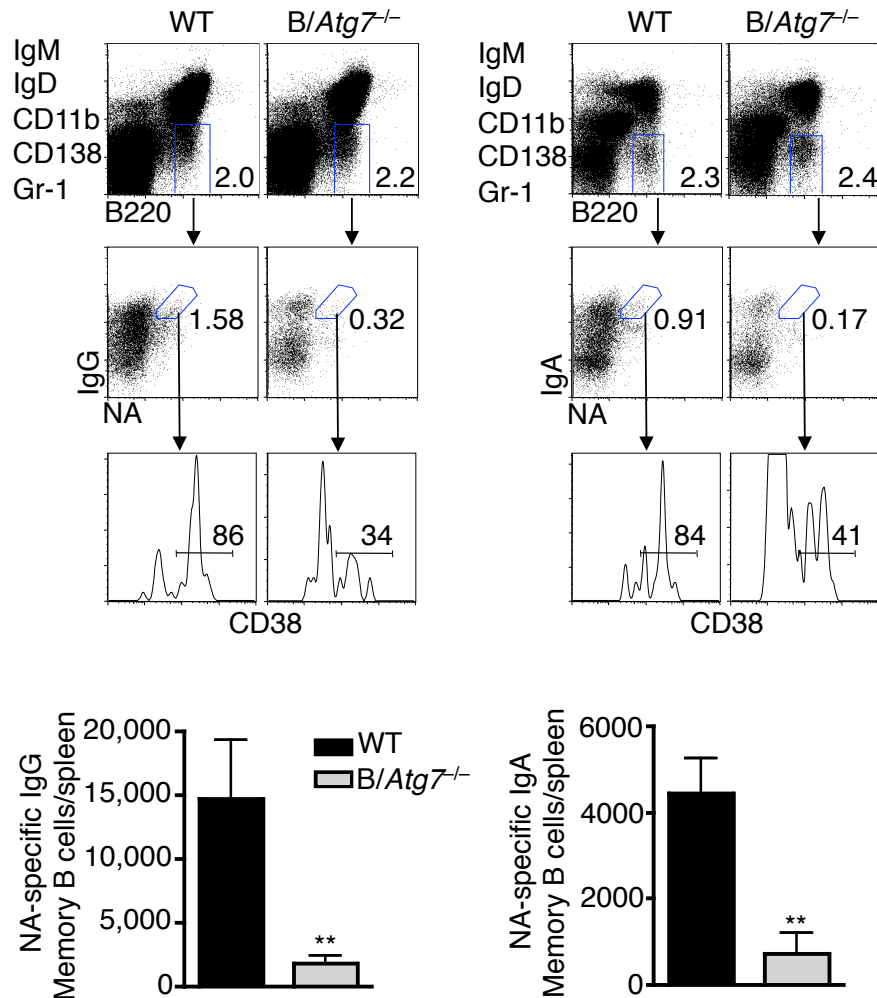**b**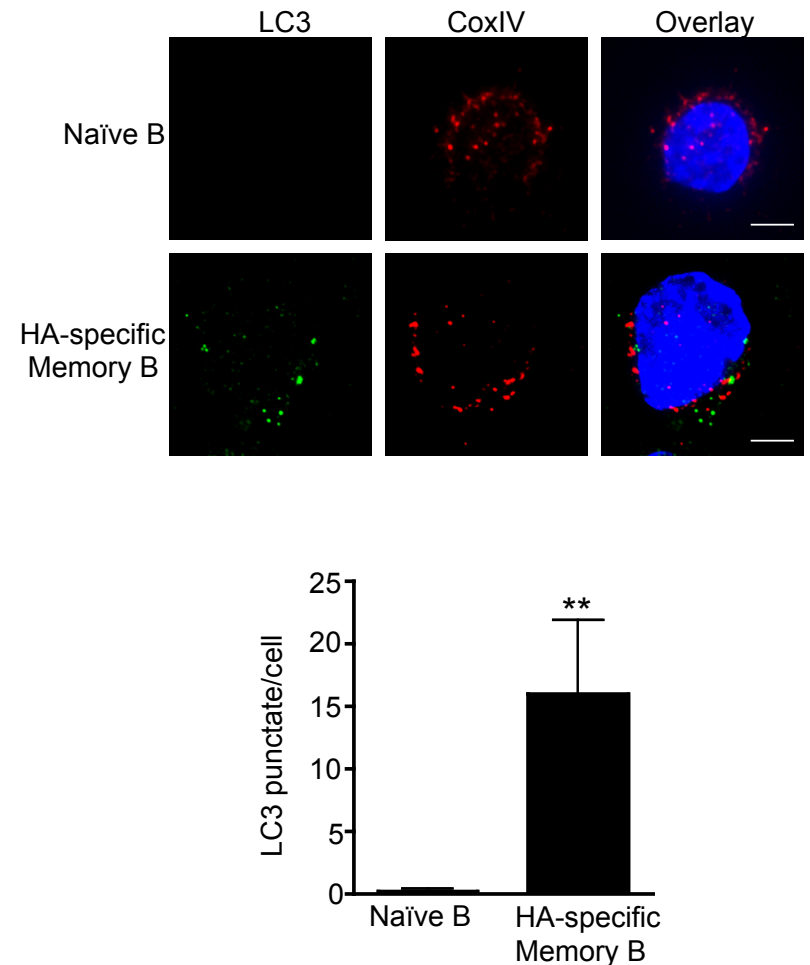

### Supplementary Figure 12. Autophagy in mouse and human influenza-specific memory B cells.

(a) Wild type (WT) and *B/Atg7<sup>-/-</sup>* mice were immunized with influenza virus at a sublethal dose of 7.5 TCID<sub>50</sub> intranasally. Two months later, neuraminidase (NA)-specific memory B cells in the spleen were examined (*n*=6 mice/group). \*\**P*<0.01. (b) Human CD19<sup>+</sup>CD27<sup>-</sup>IgG<sup>-</sup>IgA<sup>-</sup> naïve B cells and H3N2 Influenza A HA-specific CD19<sup>+</sup>CD27<sup>+</sup>IgG<sup>+</sup>HA<sup>+</sup> memory B cells were sorted and used for immunocytochemistry staining of LC3 and CoxIV. The nuclei were counterstained with DAPI. LC3 punctates per cell were quantitated. Data are representative of five donors. \*\**P*<0.01. Scale bar: 5 μm.
